# Supplementary material
Source: Springer Nature journal article supplement (https://www.springermedizin.de/resource/supplementary/13256_2006_8_MOESM1_ESM.pdf/9645596)

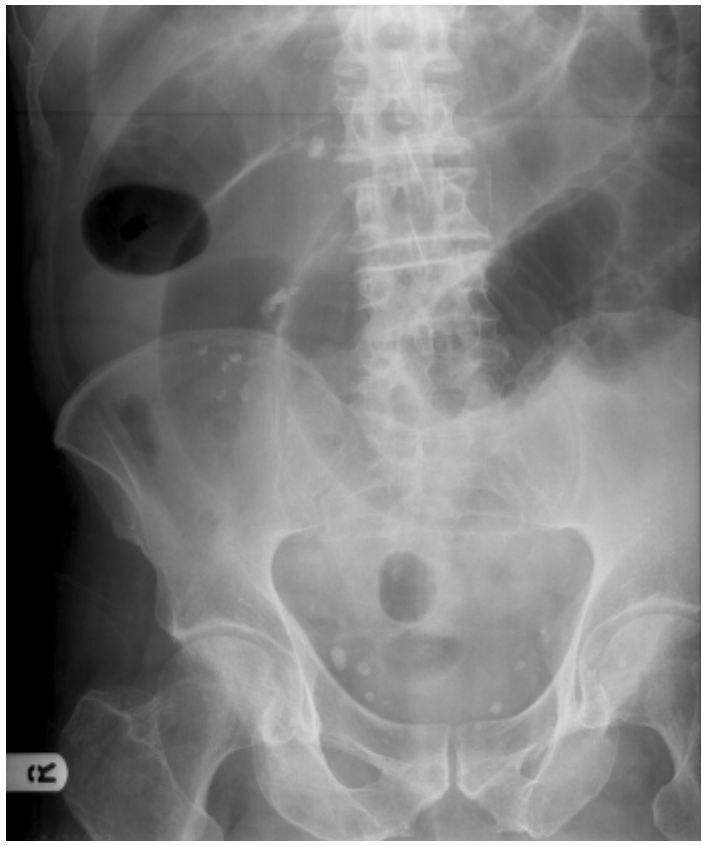

12

Supplement: MOESM1 [file 9645596]
